# Supplementary material for: When Sex Chromosomes Recombine Only in the Heterogametic Sex: Heterochiasmy and Heterogamety in Hyla Tree Frogs
Source: PubMed Central journal article supplement — Mol Biol Evol. 2020 Aug 6;38(1):192–200. doi: 10.1093/molbev/msaa201 (PMC7782862; doi:10.1093/molbev/msaa201), 2020-08-06
Supplement: msaa201_supplementary_data.pdf [file msaa201_supplementary_data.pdf]

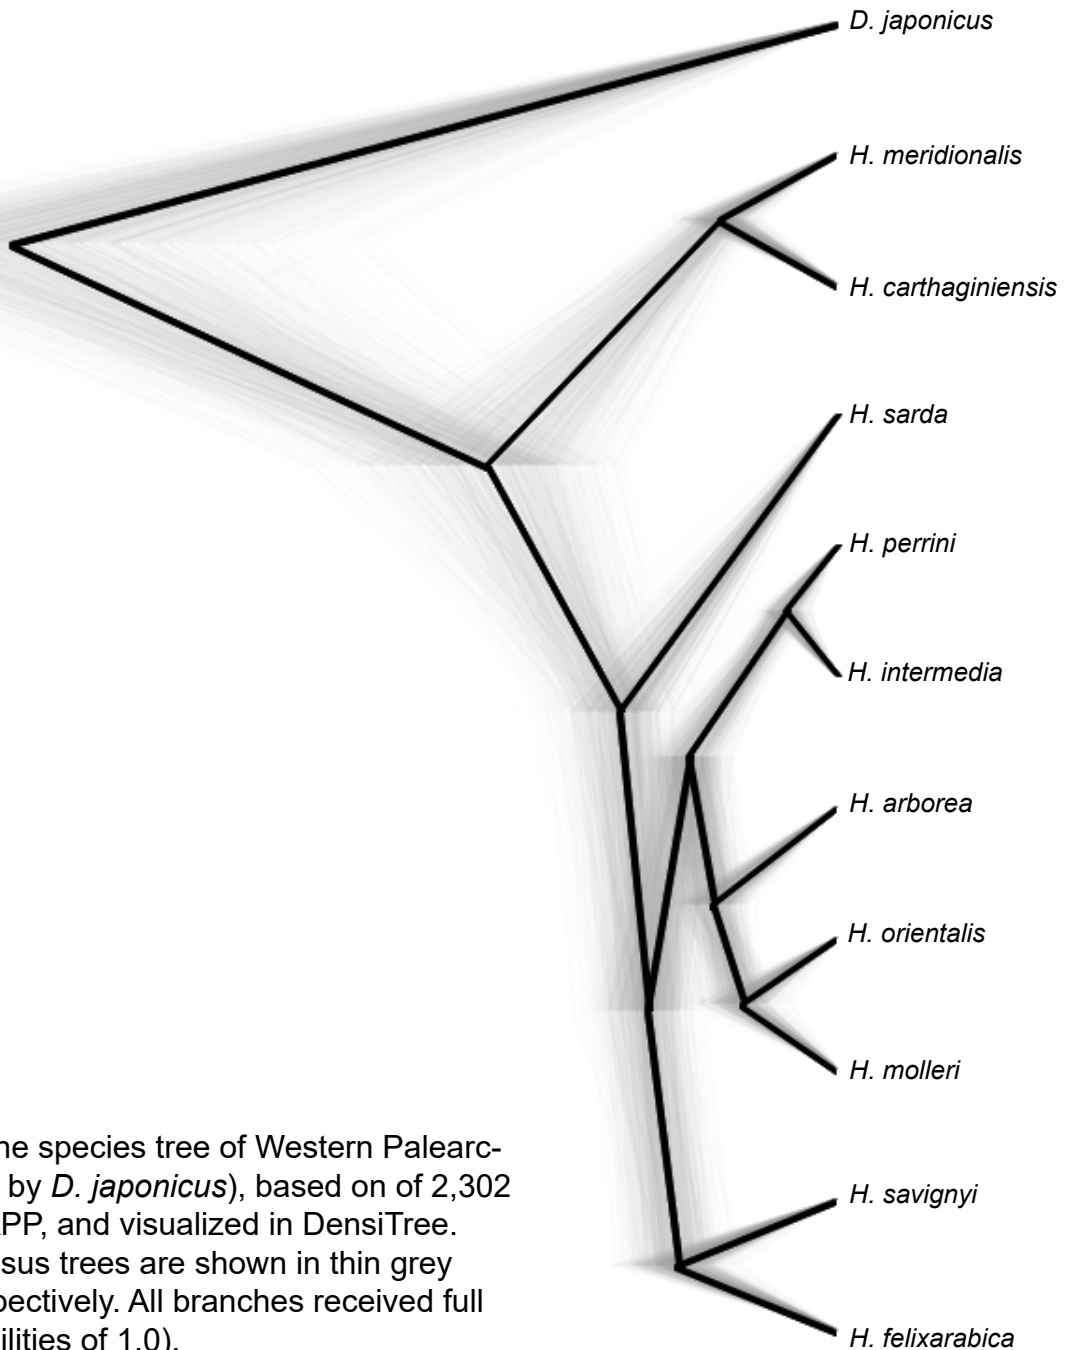

**Fig. S1:** Cloudogram of the species tree of Western Palearctic tree frogs (outgrouped by *D. japonicus*), based on of 2,302 SNPs analyzed with SNAPP, and visualized in DensiTree. The sampled and consensus trees are shown in thin grey and black thick lines, respectively. All branches received full support (posterior probabilities of 1.0).
